# Supplementary material for: Structural Characterization and Antifatigue Activity of a Novel Exopolysaccharide Isolated from Marasmius androsaceus
Source: Hindawi journal article supplement (doi:10.1155/2023/2180179), 2023-08-17
Supplement: f1 [file 2180179.f1.doc]

**SUPPLEMENTARY MATERIALS**

**Table S.1.** Summary of main proton and carbon signals

| H | 1.79-2.23 ppm | indicate the presence of acetyl groups and methyl esterification carboxyl groups, which to some extent indicates that MEPS3 contains uronic acid[1] |
| --- | --- | --- |
| 3.50-4.11ppm | The results indicated that the polysaccharide had unique CH2-O and CH-O groups[2] |
| between 4.9 and 4.3 ppm  above 5.0 ppm | assigned to anomeric protons of β-anomers  assigned to anomeric protons of α-anomers  mainly α-gly- cosidic linkages in the backbone [3, 4] |
| no proton signal in 5.4 ppm | GF was composed of pyranose [5]  consistent with the results of FTIR analysis |
| 4.787 ppm  5.062,5.107, and 5.159 ppm  5.313 ppm | the characteristic peak of mannose  α-galactose signals  α-D-glucose heterocephalic hydrogen signals [6]  the results were consistent with monosaccharide compositions |
| C | between 65.12 and 82.13 ppm | the ring carbons [7] |
| no carbon signal in 82-88 ppm | The absence of signals in the region δ82–88 confirmed the pyranose form of all sugar residues[8] |
| 102.60–104.46 ppm | assigned to C-1 of Galp |
| 102.23 ppm | (1→4)-α-Manp[9] |

[1] X. X. Liang, Y. Y. Gao, Y. Pan, et al. "Purification, chemical characterization and antioxidant activities of polysaccharides isolated from Mycena dendrobii", *Carbohydrate Polymers,* vol. 203, no. 3,pp. 45-51, 2019.

[2] I. F. Olawuyi, and W. Y. Lee. "Structural characterization, functional properties and antioxidant activities of polysaccharide extract obtained from okra leaves (Abelmoschus esculentus)", *Food Chemistry,* vol. 354, no. 2,pp. 129437, 2021.

[3] S. He, X. Wang, Y. Zhang, et al. "Isolation and prebiotic activity of water-soluble polysaccharides fractions from the bamboo shoots (Phyllostachys praecox)", *Carbohydrate Polymers,* vol. 151, no. 1,pp. 295-304, 2016.

[4] Y. Sun, H. Wang, G. Guo, Y. Pu, and B. Yan. "The isolation and antioxidant activity of polysaccharides from the marine microalgae Isochrysis galbana", *Carbohydrate Polymers,* vol. 113, no. 4,pp. 22-31, 2014.

[5] M. Meng, D. Cheng, L. Han, Y. Chen, and C. Wang. "Isolation, purification, structural analysis and immunostimulatory activity of water-soluble polysaccharides from Grifola Frondosa fruiting body", *Carbohydrate Polymers,* vol. 157, no. 2,pp. 1134-1143, 2017.

[6] L. C. Yang, T. J. Lu, C. C. Hsieh, and W. C. Lin. "Characterization and immunomodulatory activity of polysaccharides derived from Dendrobium tosaense", *Carbohydrate Polymers,* vol. 111, no. 2,pp. 856-863, 2014.

[7] L. C. Yang, C. C. Hsieh, and W. C. Lin. "Characterization and immunomodulatory activity of rice hull polysaccharides", *Carbohydrate Polymers,* vol. 124, no. 4,pp. 150-156, 2015.

[8] I. S. Bushmarinov, O. G. Ovchinnikova, N. A. Kocharova, et al. "Structure of the O-polysaccharide from the lipopolysaccharide of Providencia alcalifaciens O29", *Carbohydr Research,* vol. 341, no. 9,pp. 1181-1185, 2006.

[9] B. Liu, Z. Z. Shang, Q. M. Li, et al. "Structural features and anti-gastric cancer activity of polysaccharides from stem, root, leaf and flower of cultivated Dendrobium huoshanense", *International Journal of Biological Macromolecules,* vol. 143, no. 4,pp. 651-664, 2020.


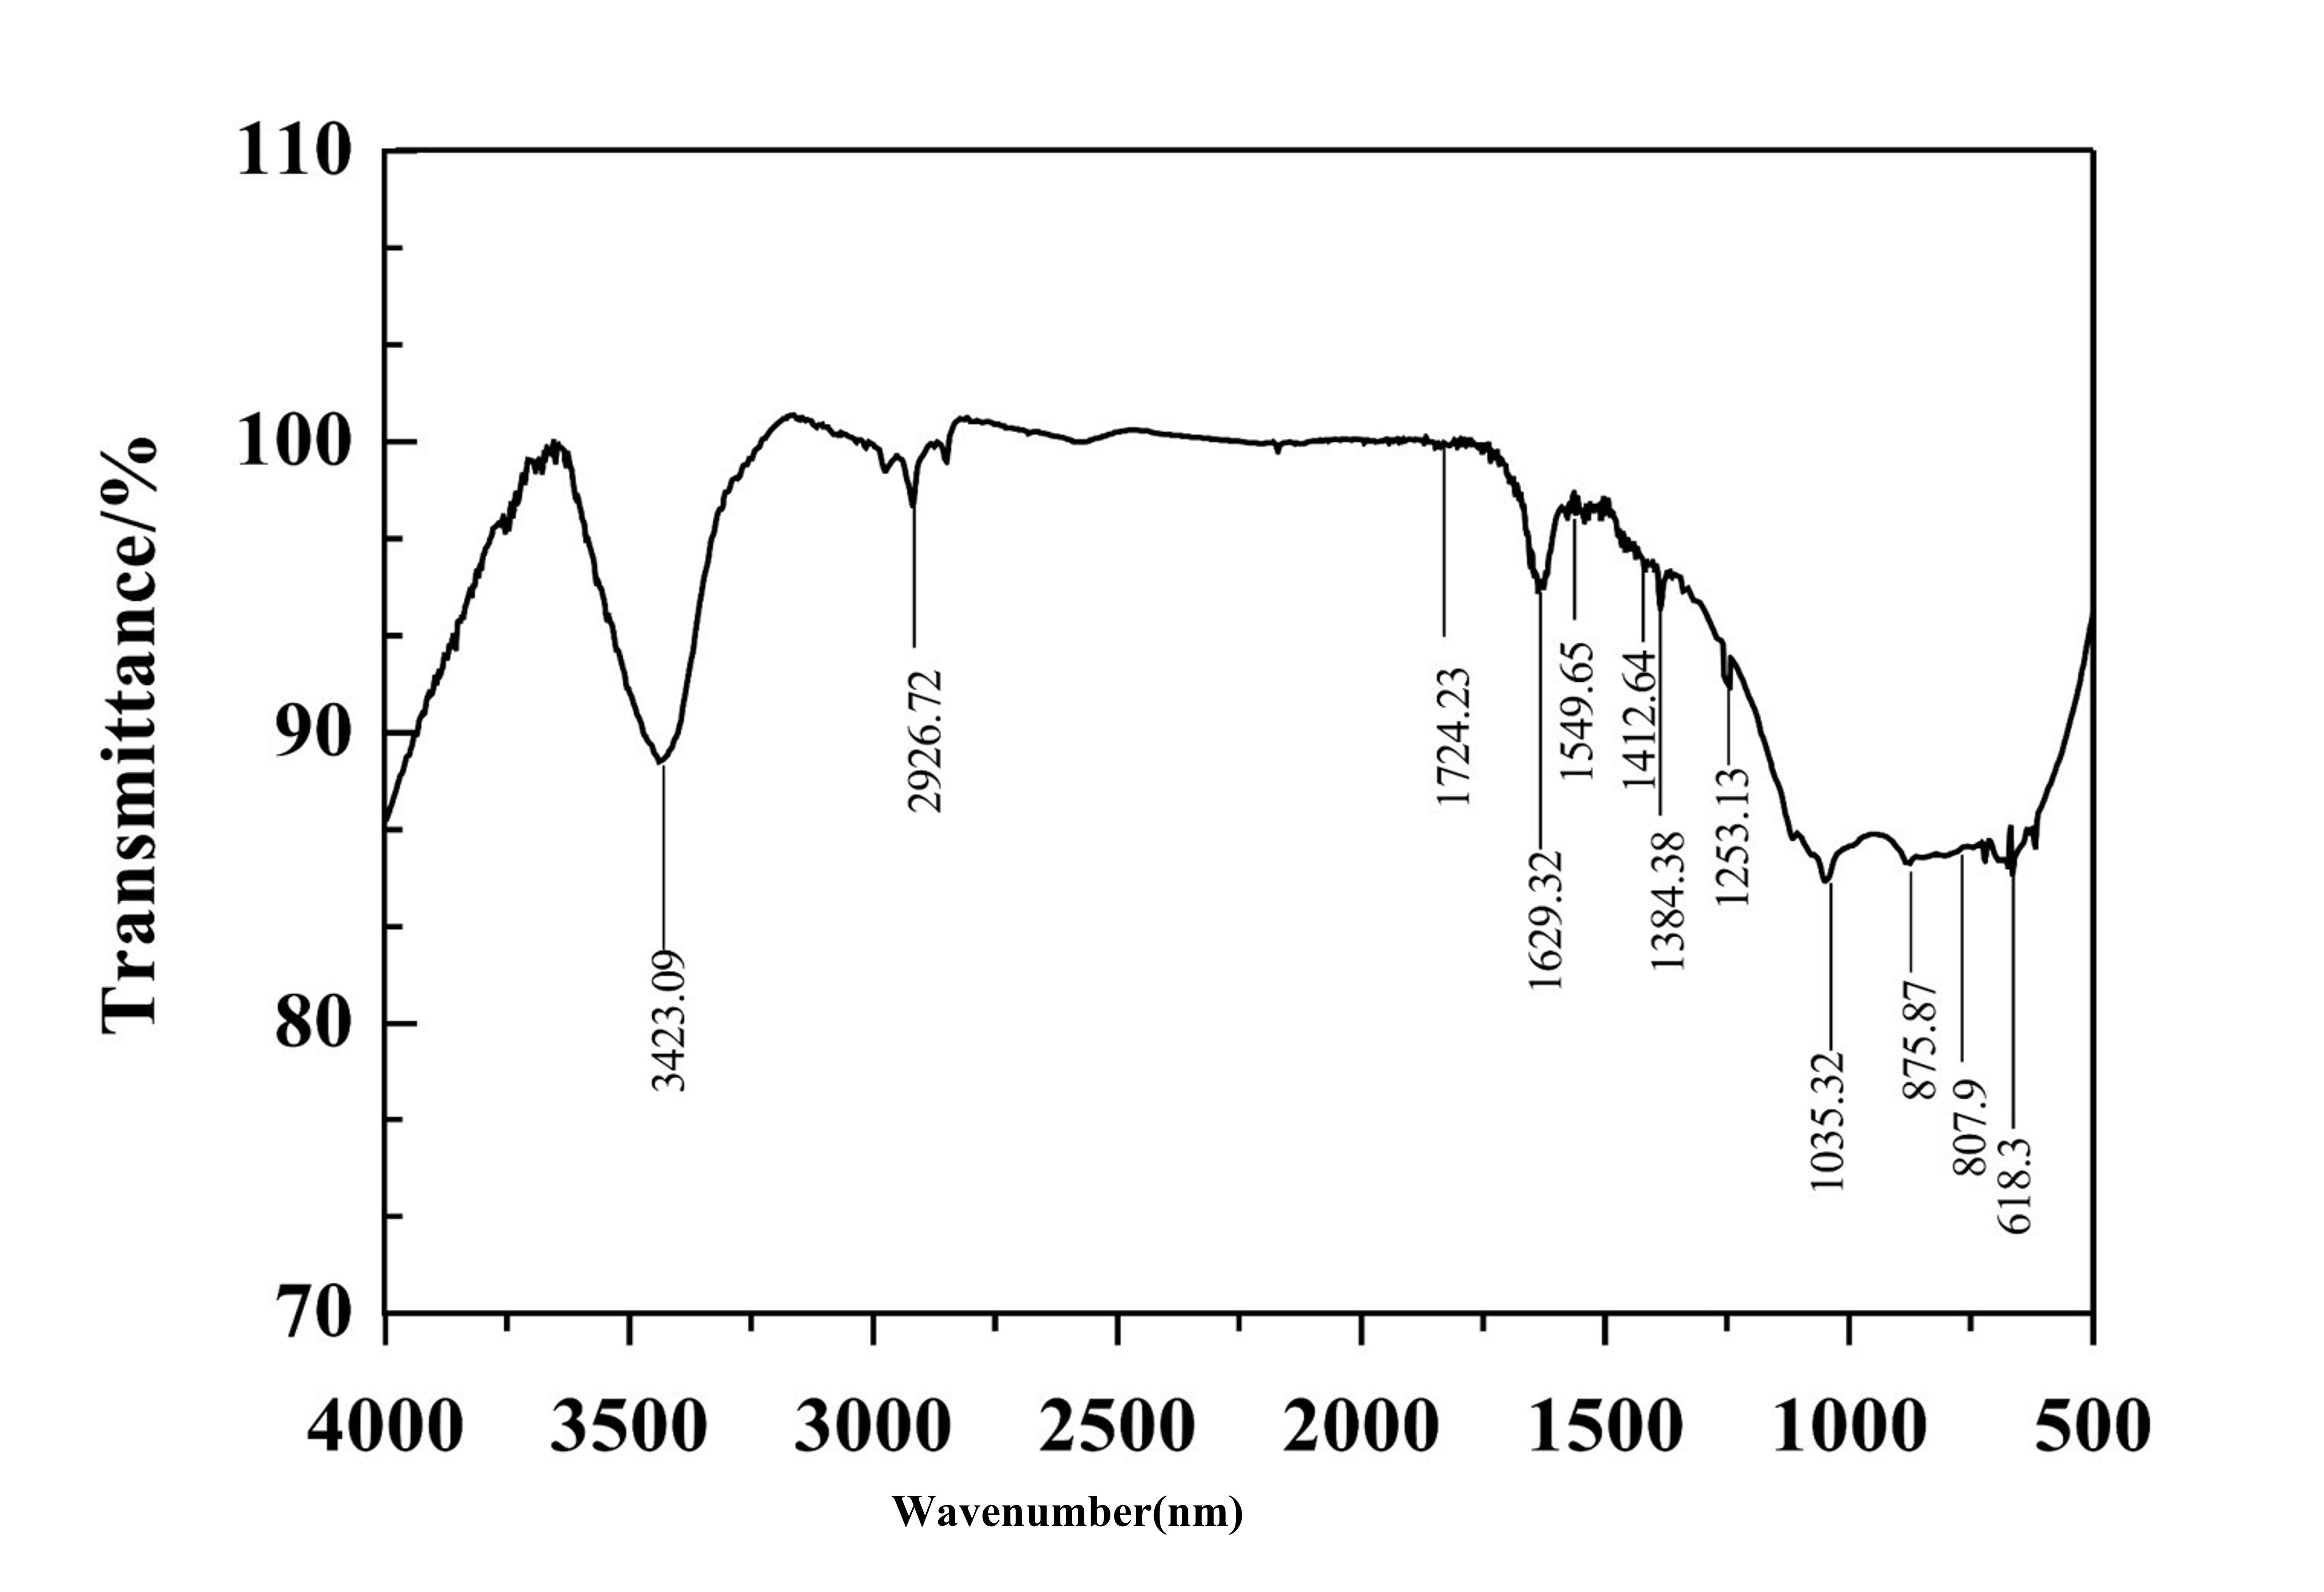


Figure S1 The FT-IR spectra of MEPS3
